# Supplementary material for: Free-standing cobalt hydroxide nanoplatelet array formed by growth of preferential-orientation on graphene nanosheets as anode material for lithium-ion batteries
Source: Royal Society of Chemistry journal article supplement (doi:10.1039/c4ta05073h), 2014-01-01
Supplement: c4ta05073h1.pdf [file c4ta05073h1.pdf]

# Free-Standing Cobalt Hydroxide Nanoplatelet Array Formed by Growth of Preferential-Orientation on Graphene Nanosheets as Anode Material for Lithium-Ion Batteries

Jisheng Zhou,<sup>a,b</sup> Jingming Li,<sup>a</sup> Kunhong Liu,<sup>c</sup> Ling Lan,<sup>c</sup> Huaihe Song,<sup>\*,a</sup> and Xiaohong Chen<sup>a</sup>

*a* State Key Laboratory of Chemical Resource Engineering, Beijing Key Laboratory of Electrochemical Process and Technology for Materials, Beijing University of Chemical Technology, Beijing, P. R. China. Fax: +86 10-64434916; Tel: +86 10-64434916; E-mail: [songhh@mail.buct.edu.cn](mailto:songhh@mail.buct.edu.cn)

*b* Changzhou Institute of Advanced Materials, Beijing University of Chemical Technology, Jiangsu, P. R. China.

*c* Petrochemical Research Institute, PetroChina Company Limited, Beijing, 100195, China

## 1. Supporting Data

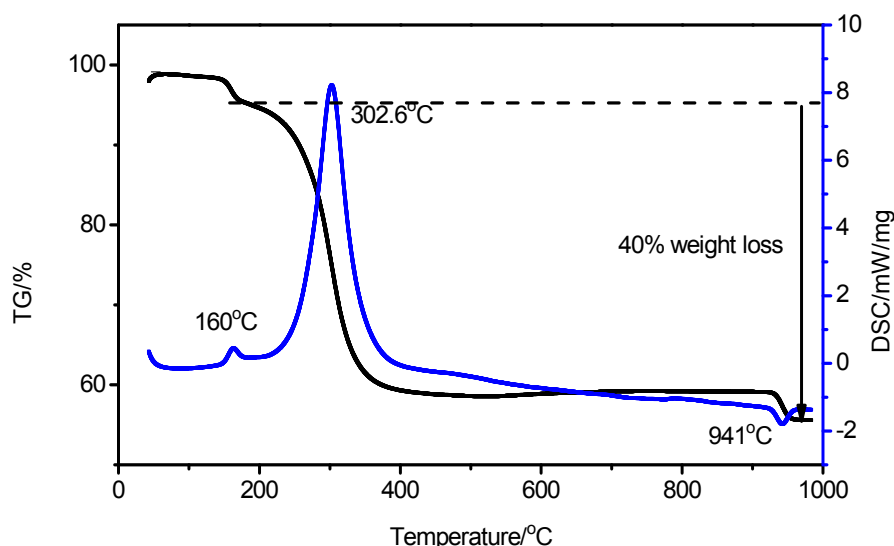

**Figure 1.** TG and DSC curves of the  $\text{Co}(\text{OH})_2$ array/GNSs composites measured at a heating rate of  $5\text{ }^\circ\text{C min}^{-1}$  in a flowing air.

The content of GNSs of the composites was determined by TGA and DSC technique carried out in the oxygen atmosphere, as shown in Fig. S1. A small endothermic peak on the DSC curve and a clear weight loss about  $200\text{ }^\circ\text{C}$ , assigning to the decomposition of  $\text{Co}(\text{OH})_2$  to  $\text{CoO}$ . The weight change from  $200\text{ }^\circ\text{C}$  to  $400\text{ }^\circ\text{C}$  owing to the complete combustion of graphene and the oxidation of  $\text{CoO}$ . In addition, there exists a endothermic peak at  $940\text{ }^\circ\text{C}$  because  $\text{Co}_3\text{O}_4$  can be reduced into  $\text{CoO}$  nanoparticles over  $900\text{ }^\circ\text{C}$ . As a

result, the weight percentages of  $\text{Co(OH)}_2$  and GNSs are approximately 70% and 30% calculated from the weight loss.

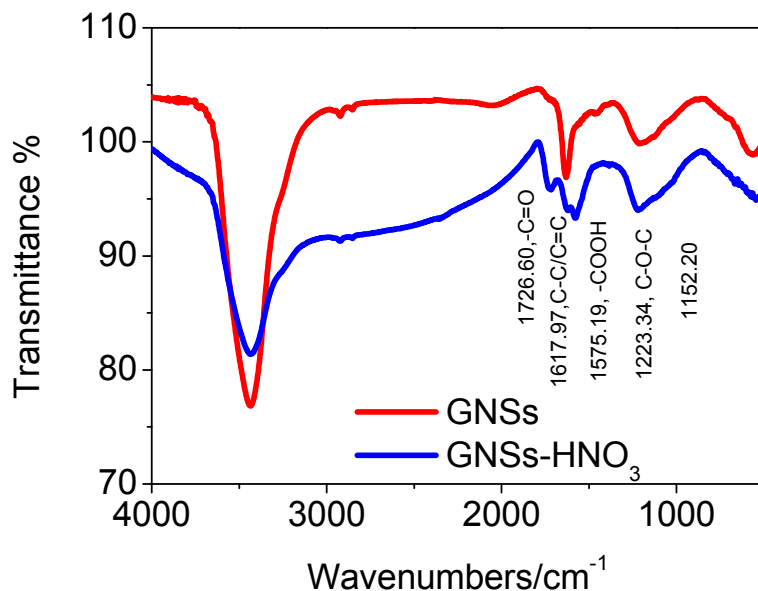

**Figure S2** FTIR spectra of original GNSs and GNSs oxidized by  $\text{HNO}_3$  at  $80^\circ\text{C}$  for 6 h.

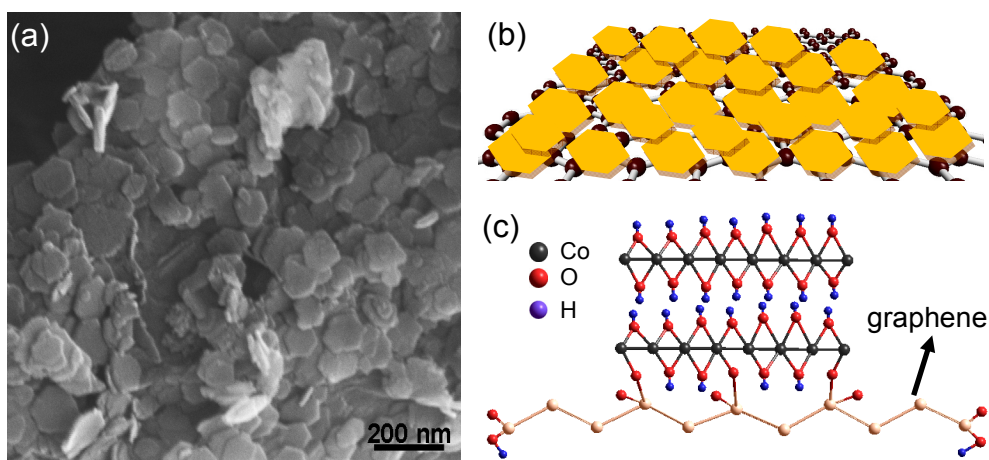

**Figure S3** (a) SEM image of hexagonal  $\text{Co(OH)}_2$  nanoplates on GNSs- $\text{HNO}_3$ , (b) schematic illustration of  $\text{Co(OH)}_2$  nanoplates laid flat on GNSs- $\text{HNO}_3$ , and (c) model of interaction between  $\text{Co(OH)}_2$  nanoplates and  $-\text{COOH}$  groups on GNSs- $\text{HNO}_3$ .

**Table S1** Data for Raman spectra

|           | Peak Center/ $\text{cm}^{-1}$ | Intensity | Peak Center/ $\text{cm}^{-1}$ | Intensity |
|-----------|-------------------------------|-----------|-------------------------------|-----------|
| D peak    | 1364                          | 60.1      | 1364                          | 47.5      |
| G peak    | 1602                          | 58.8      | 1602                          | 49.0      |
| $I_D/I_G$ | 1.02                          |           | 0.97                          |           |

**Table S2** Content of various carbon atoms in the spectra of C1s peaks of Co(OH)<sub>2</sub> array/GNSs and GNSs

| Peak    | Position | Content/(%)                    |      |
|---------|----------|--------------------------------|------|
|         |          | Co(OH) <sub>2</sub> array/GNSs | GNSs |
| C-C/C=C | 284.6    | 50.9                           | 57.1 |
| C-O     | 286.1    | 13.9                           | 22.6 |
| C=O     | 287.3    | 10.5                           | 11.9 |
| O-C=O   | 289.5    | 12.2                           | 8.3  |
| Co-C    | 283.1    | 12.5                           | --   |

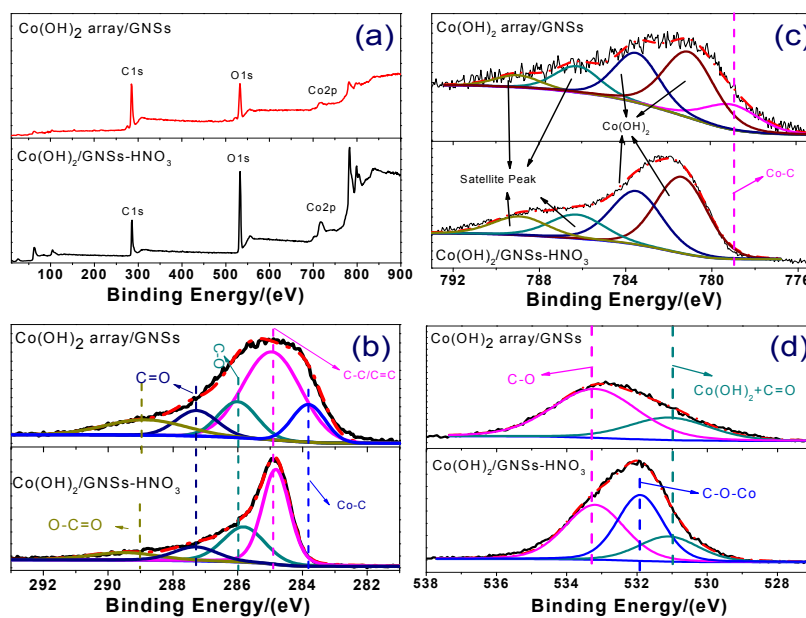

**Figure S4.** (a) XPS spectra of Co(OH)<sub>2</sub> array/GNSs and Co(OH)<sub>2</sub>/GNSs-HNO<sub>3</sub>, and their (b) C1s, (c) Co2p<sub>3/2</sub>, and (d) O1s spectra.

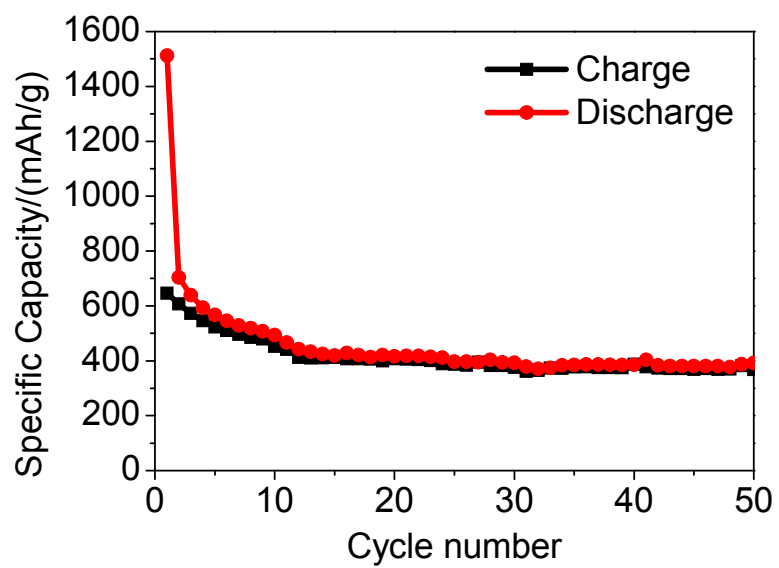

**Figure S5.** the cyclic performance of GNSs as anode material at  $50 \text{ mA g}^{-1}$
